# Supplementary material for: Structural response of G protein binding to the cyclodepsipeptide inhibitor FR900359 probed by NMR spectroscopy
Source: Royal Society of Chemistry journal article supplement (doi:10.1039/d4sc01950d), 2024-01-01
Supplement: d4sc01950d1.pdf [file d4sc01950d1.pdf]

ARTICLE

**Supporting Information**

Received 00th January 20xx,  
Accepted 00th January 20xx

DOI: 10.1039/x0xx00000x

**Structural response of G protein binding to the cyclodepsipeptide inhibitor FR900359 probed by NMR spectroscopy**

Christian Bonifer,<sup>a</sup> Wiebke Hanke,<sup>b</sup> Jonas Mühle,<sup>c</sup> Frank Löhr,<sup>a</sup> Johanna Becker-Baldus,<sup>a</sup> Jessica Nagel,<sup>d</sup> Gebhardt Schertler,<sup>c</sup> Christa E. Müller,<sup>d</sup> Gabriele M. König,<sup>b</sup> Daniel Hilger,<sup>\*e</sup> and Clemens Glaubitz<sup>\*a</sup>

## (A) Figures

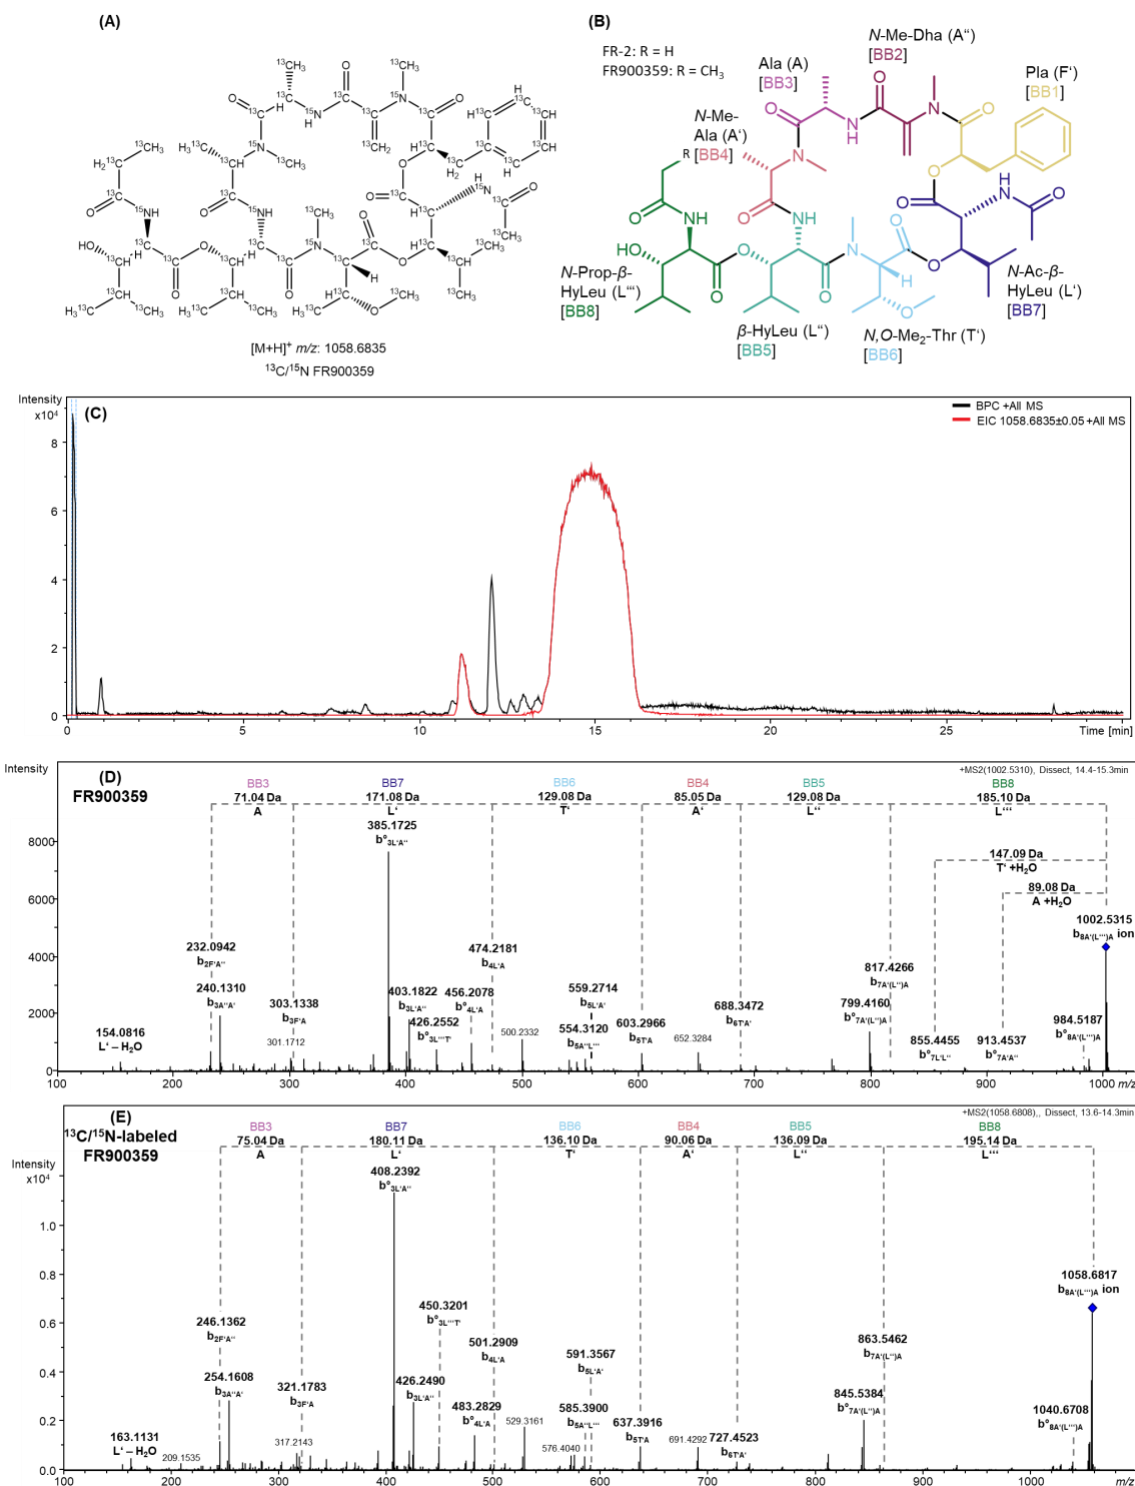

**Figure S1:** (A) Structure and exact mass of the proton adduct of the uniformly  $^{13}\text{C}/^{15}\text{N}$ -labeled FR. (B) Structure of the unlabeled FR and FR-2 with colored and named building blocks. (C) LC-MS/MS baseline peak chromatogram (BPC) of the FR fraction collected after 60 min and extracted ion chromatogram (EIC) for the  $m/z$  of the uniformly labeled FR. Fragmentation pattern of FR (D) and uniformly  $^{13}\text{C}/^{15}\text{N}$ -labeled FR (E) with fragments labeled following the nomenclature by Ngoka<sup>1</sup> based on Biemanns modifications<sup>3</sup> of Roepstorff's nomenclature in one-letter amino acid code<sup>4</sup>. b<sup>o</sup> = b-ion with loss of water. L' = N-Ac- $\beta$ -HyLeu, A = Ala, A' = N-Me-Ala, T' = N,O-Me<sub>2</sub>-Thr, L''' = N-Prop- $\beta$ -HyLeu, L'' =  $\beta$ -HyLeu, F' = Pla, A'' = N-Me-Dha.

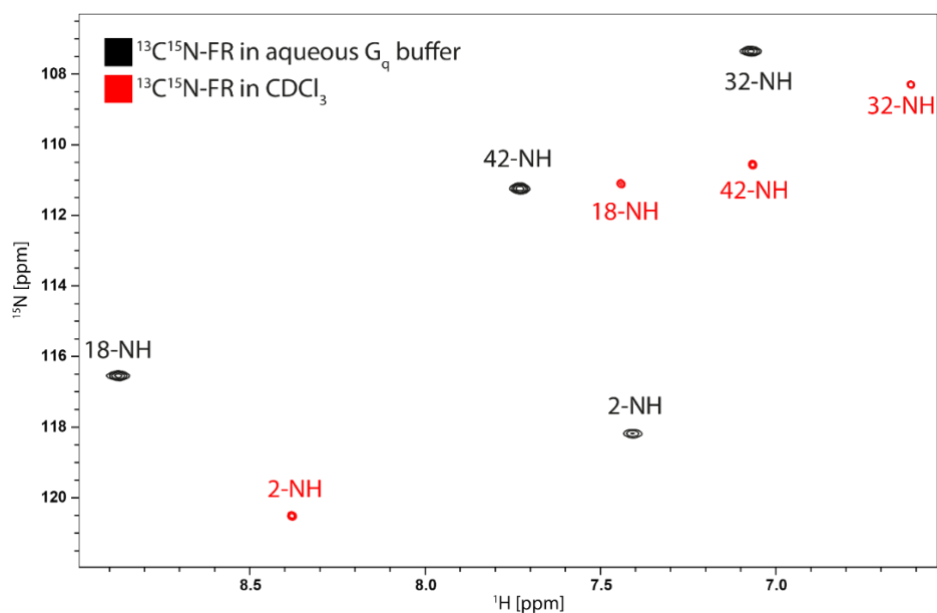

**Figure S2:** Solvent dependence of inhibitor signals by L-NMR.  $^{15}\text{N}$ - $^1\text{H}$ -BEST-TROSY spectrum of  $^{13}\text{C}^{15}\text{N}$ -labeled FR dissolved in aqueous  $\text{G}_q$  buffer (black) compared to  $\text{CDCl}_3$  (red). The detected signals show strong changes in chemical shift between the two solvents.

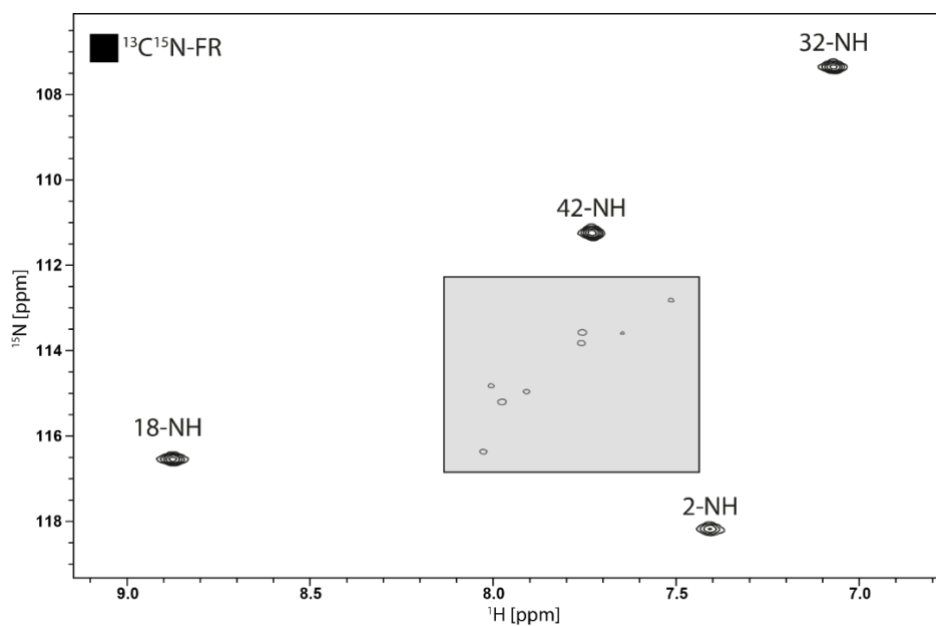

**Figure S3:** Inhibitor sample impurities detected by L-NMR.  $^{15}\text{N}$ - $^1\text{H}$ -BEST-TROSY spectrum of  $^{13}\text{C}^{15}\text{N}$ -labeled FR in aqueous buffer solution shows four strong peaks that can be assigned to the protonated nitrogen atoms in the molecule. Additional weaker signals, corresponding to labeled impurities in the sample, were also detected (gray box).

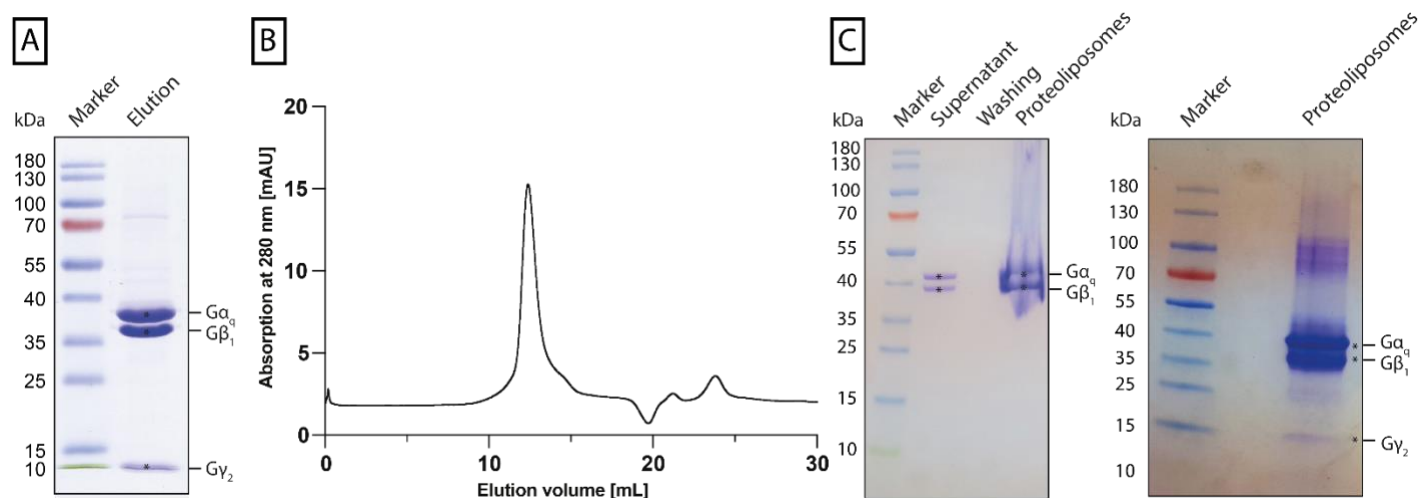

**Figure S4:** Biochemical characterization of G $_q$  protein expression and reconstitution. **(A)** SDS-PAGE analysis of the heterotrimeric G $_q$  protein, the bands for the three subunits are highlighted. **(B)** Analytical gel filtration analysis displays a distinct signal corresponding to the heterotrimer. **(C)** After reconstitution of the heterotrimeric G protein into POPC:POPE:Cholesterol liposomes, the proteoliposomes were pelleted, resuspended in lipid buffer for washing and pelleted again for NMR rotor packing. Analysis of the supernatant of the first (supernatant) and second (washing) centrifugation, as well as the proteoliposome pellet was conducted by SDS-PAGE. Two bands can be detected at  $\sim 40$  kDa for the supernatant and proteoliposome samples, corresponding to reconstituted G $\alpha_q$  and G $\beta_1$ . The G $\gamma_2$  subunit was visualized on a separate gel with a higher gradient.

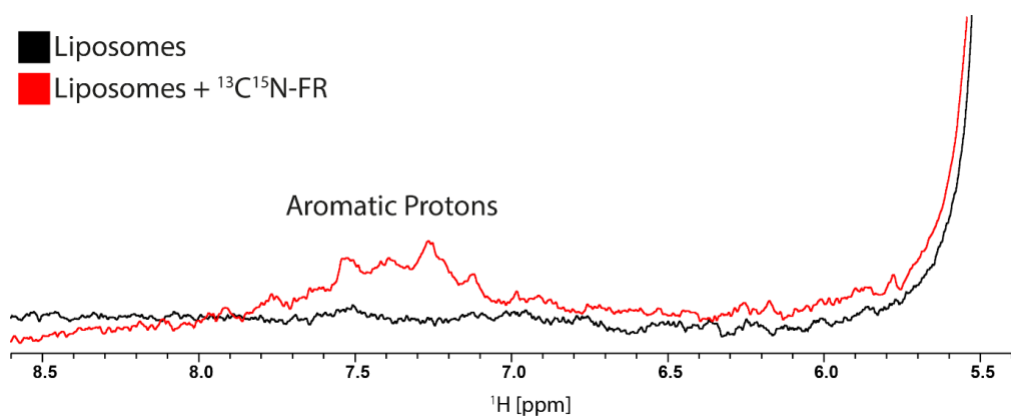

**Figure S5:** Region of aromatic protons in  $^1\text{H}$ -NMR. Signals for aromatic protons between 7 and 8 ppm are visible only in the liposome sample in the liquid-crystalline phase upon addition of FR (red). Those signals correspond to the phenyllactic acid moiety of FR, while no such protons are found in POPC:POPE:Cholesterol liposomes (black).

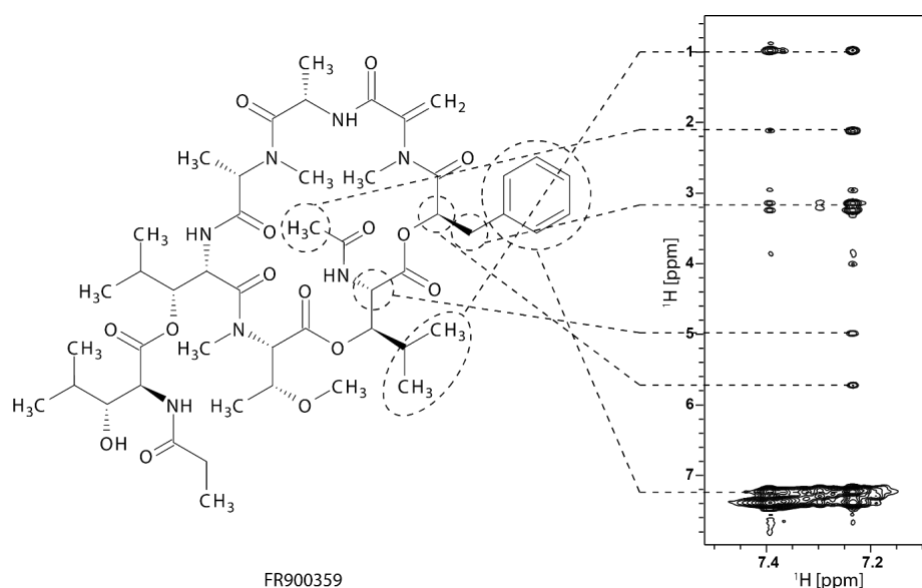

**Figure S6:** Assignment of L-NMR NOESY spectrum of FR in solution. The aromatic region of the  $^1\text{H}$ - $^1\text{H}$ -NOESY (400 ms mixing time) shows cross-peaks that represent intramolecular contacts of the aromatic ring of the phenyllactic acid moiety of FR to other parts of the inhibitor molecule. The dotted lines indicate chemical groups that correspond to the respective NOESY signals.

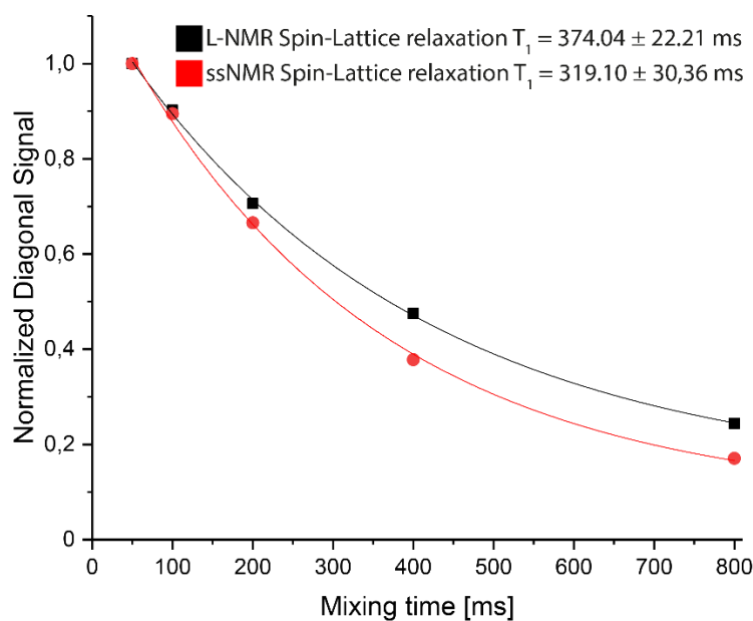

**Figure S7:** Determination of the spin-lattice relaxation rate  $T_1$  of the NOESY samples. By plotting the intensities of the diagonal signals of the aromatic ring of FR in solution (black) or incubated with POPC:POPE:Cholesterol liposomes in the liquid-crystalline phase (red), the exponential decay of the signal could be fitted to yield the rate of  $T_1$ -relaxation for the samples.

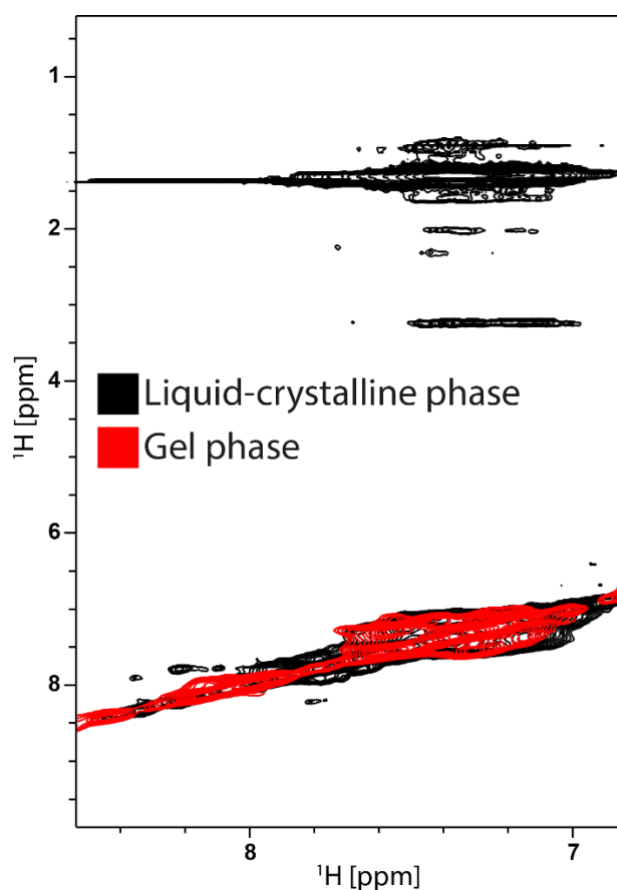

**Figure S8:** Influence of the membrane phase on FR-lipid contacts. The aromatic region of the ssNMR  $^1\text{H}$ - $^1\text{H}$ -NOESY (200 ms mixing time) shows intermolecular contacts between FR and the POPC lipid only when the sample is in the liquid-crystalline phase but not for the gel phase.

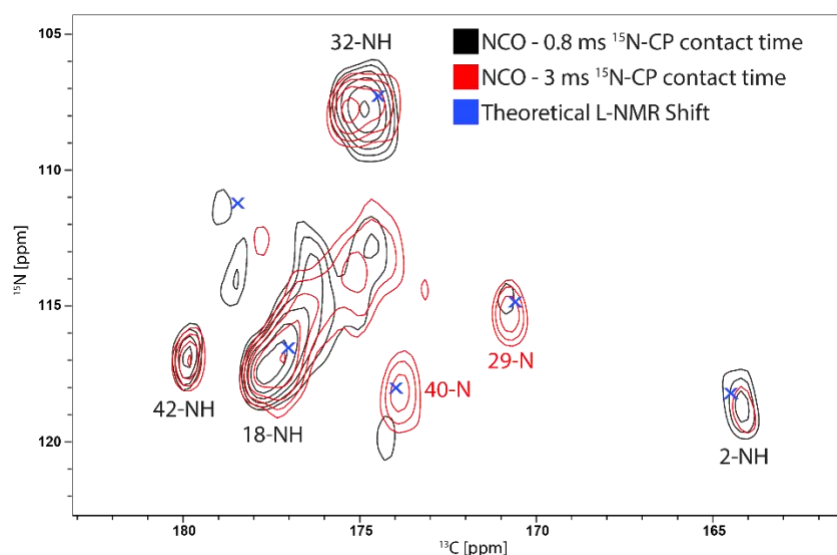

**Figure S9:** NCO spectra of  $^{13}\text{C}^{15}\text{N}$ -labeled FR bound to the membrane-anchored  $G_q$  heterotrimer. Additional resonances, corresponding to methylated nitrogen atoms, are appearing in the spectrum when longer  $^{15}\text{N}$ -CP contact times are applied. The theoretical L-NMR chemical shift of the annotated signals is marked by blue crosses.

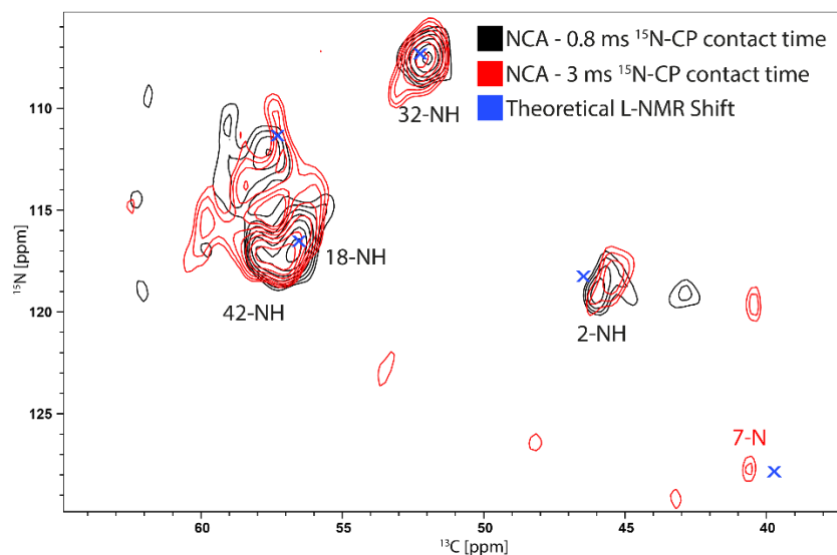

**Figure S10:** NCA spectra of  $^{13}\text{C}^{15}\text{N}$ -labeled FR bound to the membrane-anchored  $\text{G}_q$  heterotrimer. An additional resonance, corresponding to one methylated nitrogen atom, is appearing in the spectrum when longer  $^{15}\text{N}$ -CP contact times are applied. The theoretical L-NMR chemical shift of the annotated signals is marked by blue crosses.

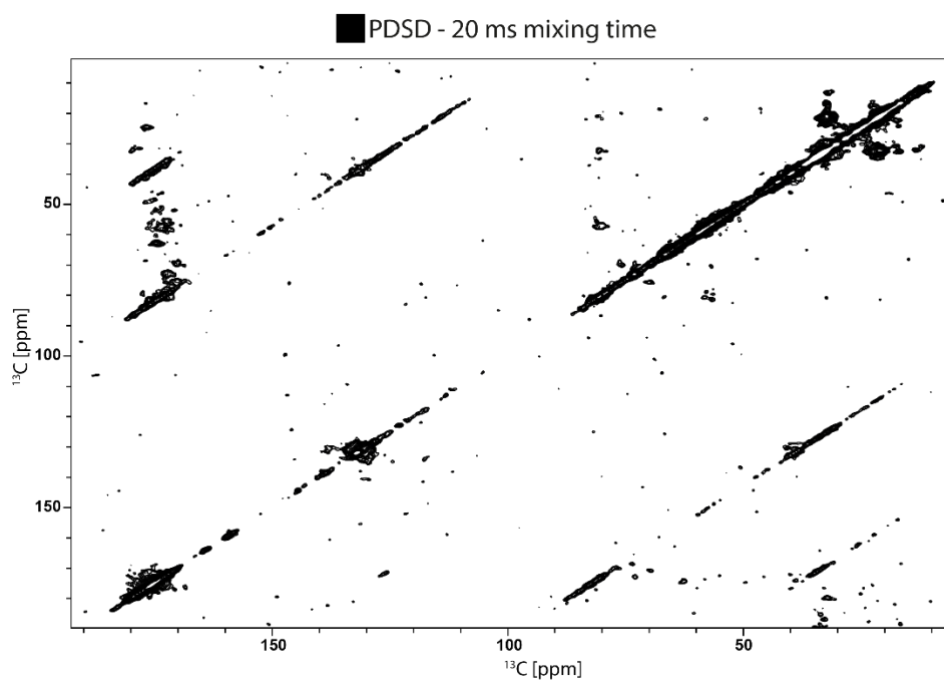

**Figure S11:**  $^{13}\text{C}^{13}\text{C}$ -PDSD spectrum of  $^{13}\text{C}^{15}\text{N}$ -labeled FR bound to the membrane-anchored  $\text{G}_q$  heterotrimer with 20 ms mixing time.

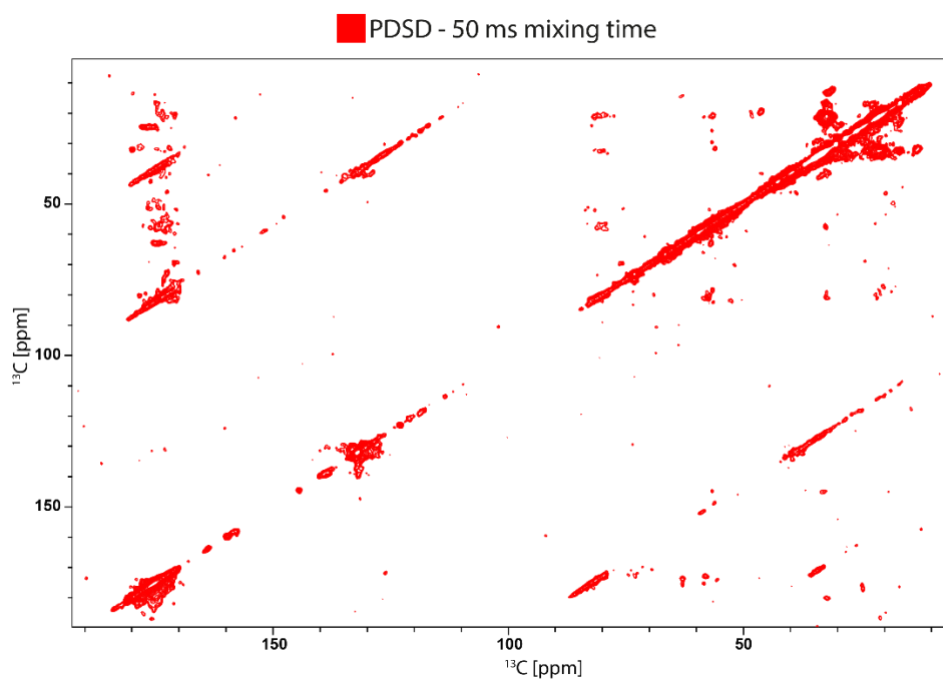

**Figure S12:**  $^{13}\text{C}$  $^{13}\text{C}$ -PDSD spectrum of  $^{13}\text{C}^{15}\text{N}$ -labeled FR bound to the membrane-anchored  $\text{G}_q$  heterotrimer with 50 ms mixing time.

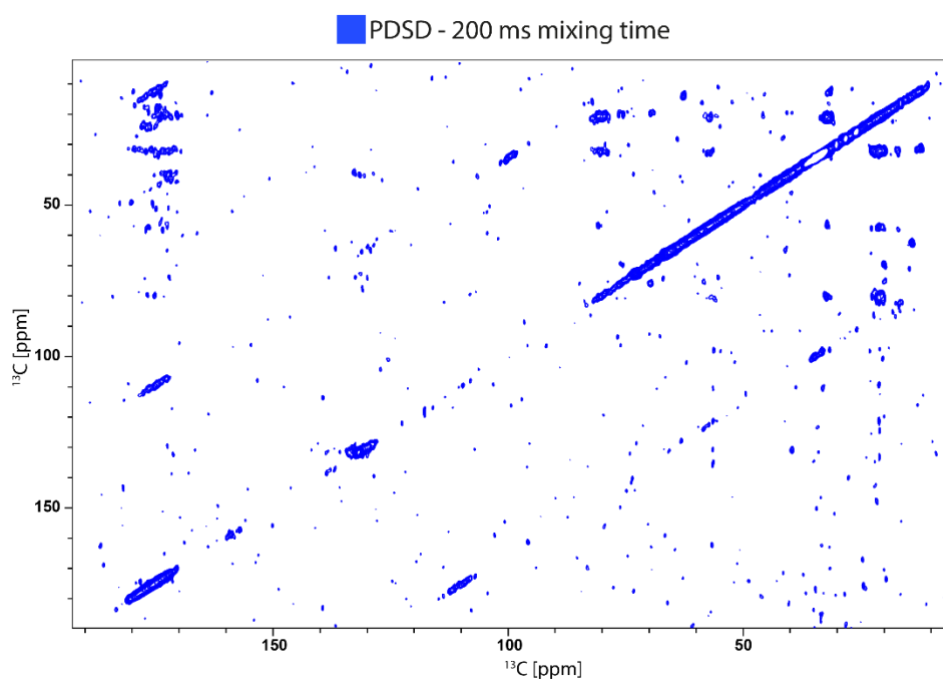

**Figure S13:**  $^{13}\text{C}$  $^{13}\text{C}$ -PDSD spectrum of  $^{13}\text{C}^{15}\text{N}$ -labeled FR bound to the membrane-anchored  $\text{G}_q$  heterotrimer with 200 ms mixing time.



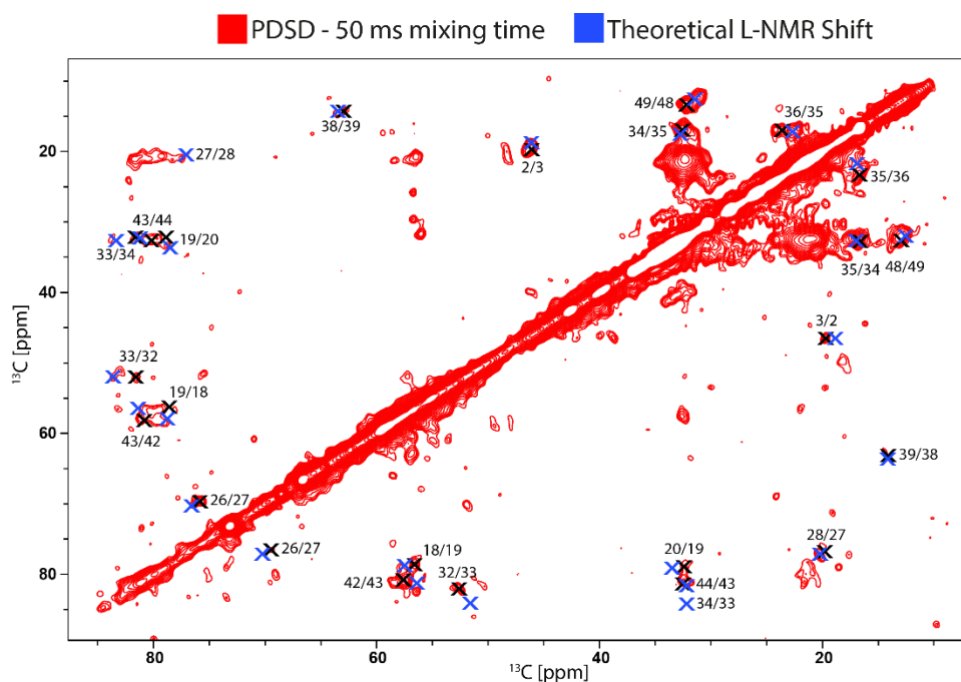

**Figure S14:**  $^{13}\text{C}^{13}\text{C}$ -PDSD spectrum of  $^{13}\text{C}^{15}\text{N}$ -labeled FR bound to the membrane-anchored  $\text{G}_q$  heterotrimer with 50 ms mixing time magnified to the  $\alpha\text{-C}\beta$  region with annotated one-bond-correlation cross-peaks. The theoretical L-NMR chemical shift of the annotated signals is marked by blue crosses.

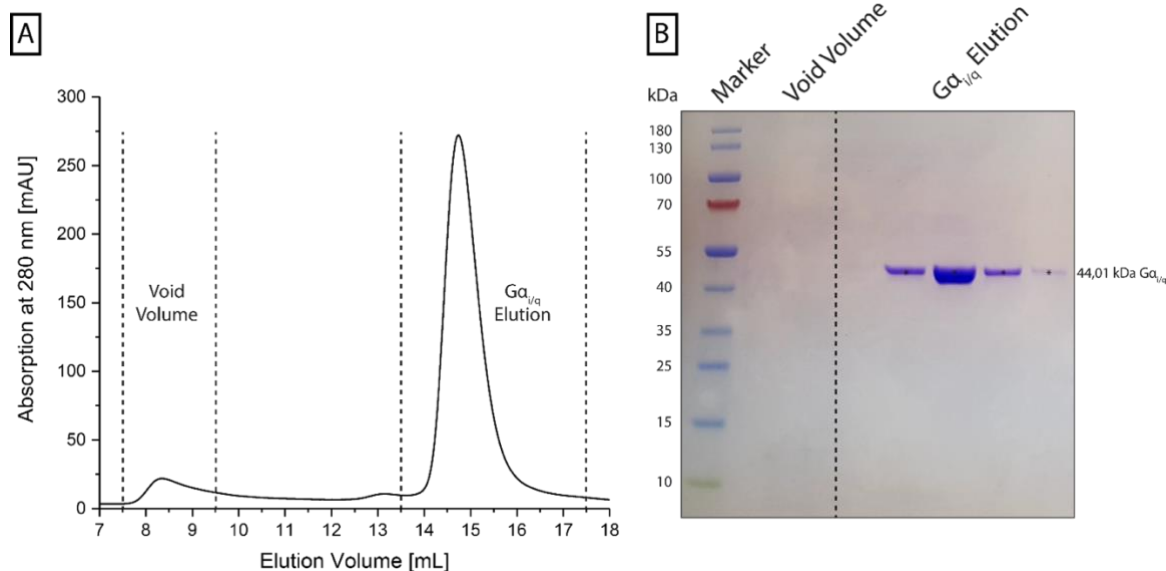

**Figure S15:** Analysis of  $\text{G}\alpha_{i/q}$  protein expression. Size exclusion run of  $\text{G}\alpha_{i/q}$  protein (A) and collected peak fractions analyzed by SDS-PAGE (B). The band between 40 kDa and 55 kDa corresponds to  $\text{G}\alpha_{i/q}$  (44,01 kDa).

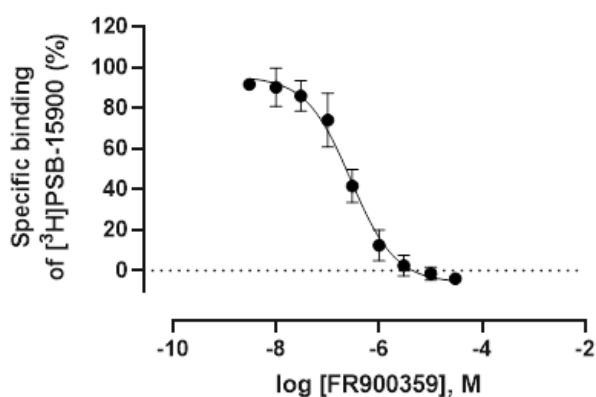

**Figure S16:** Radioligand binding assay using recombinant  $G\alpha_{i/q}$  protein (5  $\mu$ g) attached to metal resin beads via its 10x histidine tag. FR displaced [ $^3$ H]PSB-15900 (5 nM) binding in a concentration-dependent manner with an estimated  $K_D$  value of  $0.271 \pm 0.069$   $\mu$ M and a  $B_{max}$  value of  $36.3 \pm 8.8$  pmol/mg of protein. These data demonstrate high affinity binding, although literature values for FR bound to  $G_q$  show even higher affinity of  $pK_i = 9.23$ .<sup>2</sup> The differences are due to chimeric and monomeric nature of  $G\alpha_{i/q}$  used here. Data are means  $\pm$  standard deviation from 3 separate experiments performed in duplicates.

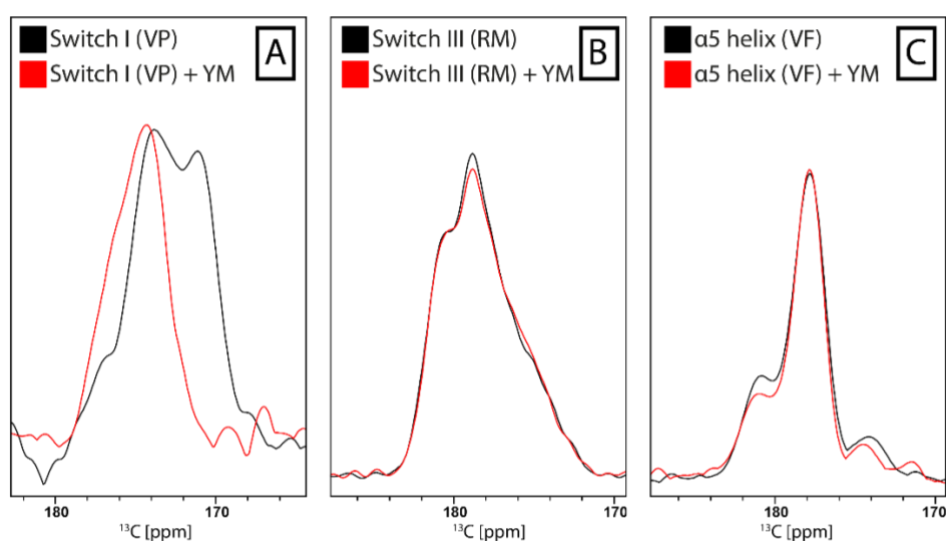

**Figure S17:** Spatially resolved protein response to YM binding by DNP-enhanced ssNMR.  $^{13}$ C-NCOX spectrum of frozen  $G\alpha_{i/q}$  solution (black). Labeling schemes were chosen to detect one unique pair signal in switch I (**A**), switch III (**B**) or in the  $\alpha 5$  helix (**C**). Addition of YM to the samples leads to narrowing of the signal in switch I, no effects in switch III and minor effects in the  $\alpha 5$  helix (red).

## ARTICLE

## (B) Tables

**Table S1:** Chemical shift assignment of  $^{13}\text{C}^{15}\text{N}$ -labeled FR in aqueous  $G_q$  protein buffer (L-NMR) and bound to reconstituted  $G_q$  protein in POPC:POPE:Cholesterol (5:4:1) proteoliposomes (ssNMR). [I/II/III] set of L-NMR resonances can be assigned to both atoms. [\*] overlapping resonances.

| Residue                | Atom No.        | Chemical Shift |                 |                 |                 |                 |
|------------------------|-----------------|----------------|-----------------|-----------------|-----------------|-----------------|
|                        |                 | L-NMR          |                 |                 | ssNMR           |                 |
|                        |                 | $^1\text{H}$   | $^{13}\text{C}$ | $^{15}\text{N}$ | $^{13}\text{C}$ | $^{15}\text{N}$ |
| Alanine                | 1               | -              | 174             | -               | 173,63          | -               |
|                        | 2               | 5,25           | 46,48           | -               | 46,11           | -               |
|                        | 2-NH            | 7,39           | -               | 118,17          | -               | 118,77          |
|                        | 3               | 1,2            | 19,03           | -               | 19,48           | -               |
| N-methyldehydroalanine | 4               | -              | 164,56          | -               | 163,86          | -               |
|                        | 5               | -              | 143,76          | -               | N/A             | -               |
|                        | 6a              | 6,02           | 125,72          | -               | N/A             | -               |
|                        | 6b              | 3,6            | -               | -               | -               | -               |
|                        | 7               | 2,95           | 39,77           | -               | 40,53           | -               |
|                        | 7-N             | -              | -               | 127,75          | -               | 127,72          |
| Phenyllactic acid      | 8               | -              | 172,19          | -               | 172,53          | -               |
|                        | 9               | 5,74           | 73,36           | -               | 73,07           | -               |
|                        | 10a             | 3,28           | 40,71           | -               | 40,12           | -               |
|                        | 10b             | 3,19           | -               | -               | -               | -               |
|                        | 11              | -              | N/A             | -               | N/A             | -               |
|                        | 12/16           | 7,24           | 132,75          | -               | N/A             | -               |
|                        | 13/15           | 7,23           | 131,25          | -               | N/A             | -               |
|                        | 14              | 7,18           | 129,53          | -               | N/A             | -               |
| N-acetylhydroxyleucine | 17              | -              | 172,38          | -               | 172,12          | -               |
|                        | 18              | 5,07           | 56,58           | -               | 56,68           | -               |
|                        | 18-NH           | 8,85           | -               | 116,53          | -               | 116,95          |
|                        | 19              | 5,54           | 81,5            | -               | 78,72           | -               |
|                        | 20              | 1,9            | 32,41           | -               | 32,24           | -               |
|                        | 21 <sup>I</sup> | 0,88           | 21,37           | -               | 21,04*          | -               |
|                        | 22 <sup>I</sup> | 0,91           | 20,68           | -               | 21,04*          | -               |
|                        | 23              | -              | 177,06          | -               | 177,04          | -               |
|                        | 24              | 2,14           | 24,79           | -               | 24,47           | -               |
| N,O-dimethylthreonine  | 25              | -              | N/A             | -               | 170,60          | -               |
|                        | 26              | 3,84           | 70,2            | -               | 69,71           | -               |
|                        | 27              | 3,97           | 76,72           | -               | 75,80           | -               |
|                        | 28              | 1,33           | 20,26           | -               | 20,00           | -               |
|                        | 29              | 3,26           | 42,91           | -               | 42,36           | -               |
|                        | 29-N            | -              | -               | 114,86          | -               | 114,98          |

|                            |                   |       |        |        |        |        |
|----------------------------|-------------------|-------|--------|--------|--------|--------|
|                            | 30                | 3,26  | 58,44  | -      | N/A    | -      |
| Hydroxy-leucine            | 31                | -     | 170,68 | -      | 170,58 | -      |
|                            | 32                | 5,27  | 52,21  | -      | 52,01  | -      |
|                            | 32-NH             | 7,03  | -      | 107,36 | -      | 107,66 |
|                            | 33                | 4,92  | 83,67  | -      | 81,66  | -      |
|                            | 34                | 2,16  | 32,67  | -      | 32,49  | -      |
|                            | 35 <sup>II</sup>  | 1,01  | 17,07  | -      | 16,86  | -      |
|                            | 36 <sup>II</sup>  | 0,95  | 22,93  | -      | 24,03  | -      |
| N-methylalanine            | 37                | -     | 174,53 | -      | 174,92 | -      |
|                            | 38                | 3,7   | 63,42  | -      | 62,80  | -      |
|                            | 39                | 1,43  | 14,52  | -      | 14,04  | -      |
|                            | 40                | 3,19  | 40,38  | -      | 39,86  | -      |
|                            | 40-N              | -     | -      | 118    | -      | 118,30 |
| N-propionylhydroxy-leucine | 41                | -     | 177,22 | -      | 176,23 | -      |
|                            | 42                | 5,06  | 57,34  | -      | 57,72  | -      |
|                            | 42-NH             | 7,7   | -      | 111,24 | -      | 117,05 |
|                            | 43                | 4,01  | 79     | -      | 80,95  | -      |
|                            | 44                | 1,71  | 33,29  | -      | 32,30  | -      |
|                            | 45 <sup>III</sup> | 1     | 21,76  | -      | 21,04* | -      |
|                            | 46 <sup>III</sup> | 0,94  | 21,73  | -      | 21,04* | -      |
|                            | 47                | -     | 178,49 | -      | 179,79 | -      |
|                            | 48                | 2,41  | 31,84  | -      | 32,02  | -      |
| 49                         | 1,2               | 12,59 | -      | 13,09  | -      |        |

**Table S2:** Parameters of spin relaxation ( $T_1$ ,  $T_2$ ), chemical exchange ( $k_{ex}$ ) and ps-dynamics (hetNOE) of  $^{13}C^{15}N$ -FR in solution.

| Residue      | $T_1$ [ms]     | $T_2$ [ms]     | $k_{ex}$ [ $s^{-1}$ ] | hetNOE           |
|--------------|----------------|----------------|-----------------------|------------------|
| <b>2-NH</b>  | $871 \pm 9.5$  | $58.4 \pm 2.1$ | $2700 \pm 390$        | $-1.74 \pm 0.04$ |
| <b>18-NH</b> | $880 \pm 19.2$ | $322 \pm 3.0$  | $735 \pm 38$          | $-1.56 \pm 0.03$ |
| <b>32-NH</b> | $805 \pm 11.7$ | $178 \pm 6.4$  | $1500 \pm 179$        | $-1.66 \pm 0.03$ |
| <b>42-NH</b> | $1080 \pm 3.7$ | $439 \pm 9.3$  | $736 \pm 46$          | $-1.67 \pm 0.02$ |

## References

1. L. C. Ngoka and M. L. Gross, A nomenclature system for labeling cyclic peptide fragments, *J Am Soc Mass Spectrom*, 1999, **10**, 360-363.
2. J. H. Voss, M. Crusemann, C. R. O. Bartling, S. Kehraus, A. Inoue, G. M. Konig, K. Stromgaard and C. E. Muller, Structure-affinity and structure-residence time relationships of macrocyclic G alpha(q) protein inhibitors, *Isience*, 2023, **26**.
3. K. Biemann, Mass spectrometry of peptides and proteins, *Annu Rev Biochem*, 1992, **61**, 977-1010.
4. P. Roepstorff and J. Fohlman, Proposal for a Common Nomenclature for Sequence Ions in Mass-Spectra of Peptides, *Biomed Mass Spectrom*, 1984, **11**, 601-601.
